# Supplementary material
Source: publisher figshare collection journal article supplement (https://plos.figshare.com/articles/dataset/_/4486766)
Supplement: Supplementary file 1 [file 1]

Archive with 5 entries (5 files):
- S1 CONSORT Checklist.pdf
- S1 Protocol.pdf
- S1 Table.pdf
- S2 Table.pdf
- S3 Table.pdf
