# Supplementary material
Source: publisher figshare collection journal article supplement (https://plos.figshare.com/articles/dataset/_/4486766)
Supplement: Supplementary file 1 [file 1 › S1 Table.pdf]

## Supplementary Data

**Supplementary S1 Table.** Continuous Glucose Analysis – Definitions and measures of glucose series

| <i>Parameter</i>                                | <i>Definition</i>                                                                                                                                                                      | <i>Equation</i>                                                                                                                                                                                   | <i>Reference</i> |
|-------------------------------------------------|----------------------------------------------------------------------------------------------------------------------------------------------------------------------------------------|---------------------------------------------------------------------------------------------------------------------------------------------------------------------------------------------------|------------------|
| <b>Statistical measures and temporal events</b> |                                                                                                                                                                                        |                                                                                                                                                                                                   |                  |
| <b>MEAN<sub>I</sub></b>                         | Mean glucose over time interval I<br>I: 24 h<br><br>Before Breakfast/ Lunch/ Dinner<br><br>After Breakfast/ Lunch/ Dinner<br><br>Day<br><br>Night<br><br>Early Morning                 | $MEAN_I = \frac{\sum_{i=1}^{N_I} g_i}{N_I}$                                                                                                                                                       | [1]              |
| <b>AUC180/ iAUC</b>                             | <i>AUC180</i> - Percentage Area under glucose curve above target range (180 mg/dl)<br><br><i>iAUC</i> - includes all area below the glucose curve and above the fasting concentration. | $\frac{\sum_{i=1}^{N_I-1} (g_i + g_{i+1} - 360) \cdot \Delta t / 2, \quad g_i \geq 180}{\sum_{i=1}^{N_I-1} (g_i + g_{i+1} - 2 \cdot g_{fasting}) \cdot \Delta t / 2, \quad g_i \geq g_{fasting}}$ | [2]              |
| <b>Max<sub>I</sub></b>                          | Max glucose level within 4 h after meal ingestion<br><br>I: Breakfast/ Lunch/ Dinner                                                                                                   | $\max_{4h} [g_0 \dots g_{N_I}]$                                                                                                                                                                   |                  |

| Glucose variability and risk assessment |                                                                                         |                                                                                                                                                                                   |     |
|-----------------------------------------|-----------------------------------------------------------------------------------------|-----------------------------------------------------------------------------------------------------------------------------------------------------------------------------------|-----|
| <b>SD</b>                               | Standard Deviation                                                                      | $SD = \sqrt{\frac{\sum_{i=1}^{N_I} (g_i - Mean_I)^2}{N_I - 1}}$                                                                                                                   | [1] |
| <b>% CV</b>                             | Coefficient of Variation                                                                | $CV = \frac{SD_I \cdot 100}{Mean_I}$                                                                                                                                              | [1] |
| <b>M-value</b>                          | weighted SD                                                                             | $M = \frac{\sum_{i=1}^{N_I} \left  10 \cdot \log \frac{g_i}{120} \right ^3}{N_I}$                                                                                                 | [3] |
| <b>MAGE</b>                             | Mean Amplitude of Glycemic Excursion                                                    | $MAGE = MEAN \lambda $ <p>where<br/> <math>\lambda</math> = change in glucose levels over each excursion from peak to nadir (or nadir to peak)</p> <p>and</p> $\lambda > SD_{24}$ | [4] |
| <b>MODD</b>                             | Mean of Daily Differences                                                               | $MODD = \frac{\sum_{i=1}^{N_I}  (g_i - g_{i-f \cdot 24}) }{N_I}$                                                                                                                  | [5] |
| <b>CONGA<sub>n</sub></b>                | SD of the difference between values obtained exactly n hours apart<br>n = 1, 2, 4, etc. | $CONGA_n = \sqrt{\frac{\sum_{i=1}^{N_I} (D_t - \bar{D})^2}{N_I - 1}}$                                                                                                             | [6] |

|             |                                                                                                                     |                                                                                                                                                                                                                                                                                                                                                 |     |
|-------------|---------------------------------------------------------------------------------------------------------------------|-------------------------------------------------------------------------------------------------------------------------------------------------------------------------------------------------------------------------------------------------------------------------------------------------------------------------------------------------|-----|
|             |                                                                                                                     | <p>where</p> $D_t = g_i - g_{i-f \cdot n}$ <p>and</p> $\bar{D} = \frac{\sum_{i=1}^{N_I} D_t}{N_I}$                                                                                                                                                                                                                                              |     |
| <b>BGRI</b> | <p>LBGI - Low Blood Glucose Index</p> <p>HBGI - High Blood Glucose Index</p> <p>BGRI - Blood glucose risk index</p> | $f(g_i) = 1.509 \cdot [(\ln(g_i))^{1.084} - 5.381]$ $r(g_i) = 10 \cdot f(g_i)^2$ $rl(g_i) = r(g_i) \text{ if } f(g_i) < 0 \text{ and } 0 \text{ o.w}$ $rh(g_i) = r(g_i) \text{ if } f(g_i) > 0 \text{ and } 0 \text{ o.w}$ $LBGI = \frac{1}{N_I} \sum_{i=1}^{N_I} rl(g_i)$ $HBGI = \frac{1}{N_I} \sum_{i=1}^{N_I} rh(g_i)$ $BGRI = LBGI + HBGI$ | [7] |

$g_i$  = Continuous glucose monitoring (CGM) glucose time series – glucose reading  $i$

$N_I$  = number of glucose readings for a given time interval  $I$

$\Delta t$  = time interval between adjacent samples (min)

$f$  = sampling frequency (samples per hour)

## References

- [1] Rodbard D (2007) Optimizing display, analysis, interpretation and utility of self-monitoring of blood glucose (SMBG) data for management of patients with diabetes. *J Diabetes Sci Technol* 1: 62-71
- [2] Wolever TM (2004) Effect of blood sampling schedule and method of calculating the area under the curve on validity and precision of glycaemic index values. *Br J Nutr* 91: 295-301
- [3] Schlichtkrull J, Munck O, Jersild M (1965) The M-value, an index of blood-sugar control in diabetics. *Acta Medica Scandinavica* 177: 95-102
- [4] Baghurst PA (2011) Calculating the mean amplitude of glycemic excursion from continuous glucose monitoring data: an automated algorithm. *Diabetes Technol Ther* 13: 296-302
- [5] Service FJ, Nelson RL (1980) Characteristics of glycemic stability. *Diabetes Care* 3: 58-62
- [6] McDonnell CM, Donath SM, Vidmar SI, Werther GA, Cameron FJ (2005) A novel approach to continuous glucose analysis utilizing glycemic variation. *Diabetes Technol Ther* 7: 253-263
- [7] Kovatchev BP, Clarke WL, Breton M, Brayman K, McCall A (2005) Quantifying temporal glucose variability in diabetes via continuous glucose monitoring: mathematical methods and clinical application. *Diabetes Technol Ther* 7: 849-862
