# Supplementary material
Source: publisher figshare collection journal article supplement (https://plos.figshare.com/articles/dataset/_/4486766)
Supplement: Supplementary file 1 [file 1 › S2 Table.pdf]

## Supplementary Data

**Supplementary S2 Table.** Multi-Parametric Heat Map Analysis - Parameter values normalization table

| Parameter        | Units   | -1*  | 0*   | 1**   |
|------------------|---------|------|------|-------|
| After Breakfast  | mg/dl   | 70   | 126  | 241.3 |
| After Dinner     | mg/dl   | 70   | 126  | 227.9 |
| After Lunch      | mg/dl   | 70   | 126  | 217.3 |
| AUC180/iAUC      | %       | 0    | 0    | 94.5  |
| Before Breakfast | mg/dl   | 70   | 126  | 183.0 |
| Before Dinner    | mg/dl   | 70   | 126  | 192.9 |
| Before Lunch     | mg/dl   | 70   | 126  | 194.2 |
| BGRI             | A.U     | 1.1  | 2.5  | 14.2  |
| CONGA2           | mg/dl   | 10   | 10   | 35.7  |
| CONGA4           | mg/dl   | 10   | 10   | 43.7  |
| CONGA6           | mg/dl   | 10   | 10   | 47.3  |
| Cortisol         | ng/ml   | 50   | 230  | 268.8 |
| CV               | %       | 14.3 | 17.2 | 33.5  |
| FBG              | mg/dl   | 70   | 126  | 230.0 |
| HbA1c            | %       | 4    | 5.7  | 8.8   |
| MAGE             | mg/dl   | 10   | 30   | 113.7 |
| MAX Breakfast    | mg/dl   | 126  | 180  | 276.3 |
| MAX Dinner       | mg/dl   | 126  | 180  | 250.3 |
| MAX Lunch        | mg/dl   | 126  | 180  | 254.6 |
| Mean 24          | mg/dl   | 70   | 116  | 201.7 |
| Mean Morning     | mg/dl   | 70   | 126  | 185.8 |
| Mean Night       | mg/dl   | 70   | 126  | 203.3 |
| MGTT             | mg/dl h | 10   | 25   | 104.0 |
| MODD             | mg/dl   | 10   | 10   | 55.2  |
| M-Value          | A.U     | 0.0  | 18.0 | 25.2  |
| SD 24            | mg/dl   | 10   | 20   | 44.5  |

\* "0" and "-1" are the upper and lower levels of an estimated normal interval for each parameter

\*\* "1" is the maximum value of each parameter recorded in this trial.
