# Supplementary material
Source: publisher figshare collection journal article supplement (https://plos.figshare.com/articles/dataset/_/4486766)
Supplement: Supplementary file 1 [file 1 › S3 Table.pdf]

## Supplementary Data

**Supplementary S3 Table. Experimental Data**

| Control          |              | Patients   |            |            |            |            |            |            |            |            |            |            |
|------------------|--------------|------------|------------|------------|------------|------------|------------|------------|------------|------------|------------|------------|
| <i>Parameter</i> | <i>Units</i> | <i>002</i> | <i>003</i> | <i>004</i> | <i>005</i> | <i>006</i> | <i>007</i> | <i>008</i> | <i>009</i> | <i>010</i> | <i>011</i> | <i>012</i> |
| Mean 24          | mg/dl        | 111.38     | 134.44     | 107.89     | 128.70     | 201.66     | 201.29     | 137.21     | 134.52     | 131.33     | 156.08     | 150.84     |
| Mean Morning     | mg/dl        | 101.00     | 118.00     | 112.12     | 109.33     | 185.83     | 143.71     | 136.10     | 110.17     | 110.62     | 147.33     | 132.00     |
| Mean Night       | mg/dl        | 105.37     | 127.46     | 104.31     | 96.12      | 203.31     | 179.42     | 161.68     | 108.20     | 118.63     | 143.75     | 117.46     |
| Mean Day         | mg/dl        | 118.80     | 134.60     | 107.89     | 140.50     | 204.40     | 212.20     | 162.50     | 145.22     | 137.60     | 163.70     | 154.30     |
| SD 24            | mg/dl        | 21.11      | 37.48      | 20.51      | 32.23      | 40.49      | 44.11      | 44.51      | 37.08      | 32.40      | 42.11      | 38.41      |
| Before Breakfast | mg/dl        | 112.60     | 119.40     | 131.50     | 118.00     | 178.00     | 178.50     | 132.67     | 120.70     | 128.70     | 145.00     | 133.70     |
| Before Lunch     | mg/dl        | 95.30      | 105.60     | 110.67     | 141.80     | 155.03     | 194.17     | 123.92     | 105.80     | 119.96     | 135.10     | 139.21     |
| Before Dinner    | mg/dl        | 98.67      | 127.20     | 98.70      | 131.33     | 165.80     | 192.92     | 156.11     | 111.92     | 127.75     | 134.90     | 122.08     |
| After Breakfast  | mg/dl        | 121.32     | 139.14     | 112.52     | 167.29     | 241.25     | 214.04     | 176.57     | 141.19     | 194.46     | 160.57     | 164.24     |
| Afte Lunch       | mg/dl        | 140.77     | 160.57     | 103.21     | 111.63     | 217.26     | 202.21     | 191.21     | 182.75     | 142.61     | 204.49     | 212.61     |
| Afte Dinner      | mg/dl        | 131.43     | 141.57     | 99.57      | 126.46     | 227.89     | 218.98     | 225.19     | 153.36     | 166.93     | 155.31     | 190.18     |
| MAX. Breakfast   | mg/dl        | 151.75     | 155.67     | 169.00     | 185.66     | 276.25     | 255.00     | 203.00     | 219.00     | 226.25     | 203.00     | 181.67     |
| MAX. Lunch       | mg/dl        | 152.40     | 179.00     | 132.75     | 164.80     | 240.20     | 234.00     | 204.00     | 199.00     | 168.00     | 231.20     | 253.70     |
| MAX. Dinner      | mg/dl        | 143.00     | 165.50     | 148.40     | 158.00     | 250.33     | 229.70     | 249.67     | 174.00     | 177.00     | 171.20     | 194.25     |
| AUC180/iAUC      | %            | 0.00       | 17.21      | 4.38       | 5.26       | 94.54      | 50.54      | 36.38      | 13.63      | 10.71      | 43.41      | 26.30      |
| MGTT             | mg/dl h      | 41.92      | 68.25      | 50.00      | 50.08      | 50.08      | 99.29      | 91.83      | 70.00      | 72.08      | 49.13      | 35.83      |
| M-Value          | A.U          | 4.23       | 9.98       | 4.30       | 6.70       | 23.07      | 25.20      | 8.59       | 10.00      | 8.90       | 13.80      | 12.50      |
| %CV              | %            | 18.95      | 27.88      | 19.01      | 25.04      | 20.08      | 21.91      | 32.44      | 27.56      | 24.67      | 26.98      | 25.46      |
| BGRI             | A.U          | 1.14       | 3.25       | 1.19       | 2.23       | 14.20      | 12.19      | 6.39       | 3.08       | 2.93       | 6.10       | 5.18       |
| MODD             | mg/dl        | 17.51      | 34.36      | 20.98      | 23.60      | 47.46      | 46.65      | 49.57      | 28.37      | 28.05      | 55.25      | 24.69      |
| MAGE             | mg/dl        | 54.78      | 62.32      | 40.68      | 65.18      | 90.54      | 80.08      | 113.74     | 108.17     | 78.16      | 79.45      | 80.81      |
| COGNA6           | mg/dl        | 17.34      | 35.28      | 19.15      | 31.18      | 38.45      | 39.24      | 47.33      | 28.94      | 30.03      | 32.52      | 33.13      |
| COGNA4           | mg/dl        | 20.66      | 30.14      | 18.25      | 27.56      | 37.92      | 35.18      | 43.66      | 37.27      | 30.63      | 36.72      | 31.13      |
| COGNA2           | mg/dl        | 18.28      | 19.10      | 21.07      | 21.73      | 28.22      | 27.75      | 31.91      | 32.38      | 27.60      | 30.02      | 28.81      |
| INS              | μIU/ml       | 2.95       | 2.70       | 3.47       | 3.55       | 7.77       | 8.30       | 8.86       | 3.09       | 3.36       | 3.48       | 3.05       |
| Cortisol         | ng/ml        | 213.40     | 243.60     | 156.00     | 169.20     | 94.80      | 268.80     | 103.20     | 160.80     | 128.80     | 130.60     | 194.10     |
| FBG              | mg/dl        | 113.00     | 84.00      | 138.00     | 130.00     | 230.00     | 207.00     | 156.00     | 146.00     | 123.00     | 172.00     | 167.00     |
| HbA1c            | %            | 8.10       | 7.10       | 6.60       | 6.50       | 8.80       | 7.40       | 6.90       | 7.20       | 6.30       | 7.60       | 7.60       |

| PES              |              | Patients   |            |            |            |            |            |            |            |            |            |            |
|------------------|--------------|------------|------------|------------|------------|------------|------------|------------|------------|------------|------------|------------|
| <i>Parameter</i> | <i>Units</i> | <i>002</i> | <i>003</i> | <i>004</i> | <i>005</i> | <i>006</i> | <i>007</i> | <i>008</i> | <i>009</i> | <i>010</i> | <i>011</i> | <i>012</i> |
| Mean 24          | mg/dl        | 102.25     | 125.26     | 112.25     | 121.51     | 190.83     | 157.38     | 123.08     | 127.67     | 121.27     | 147.86     | 126.27     |
| Mean Morning     | mg/dl        | 93.69      | 80.93      | 110.55     | 98.09      | 172.12     | 118.51     | 108.77     | 100.57     | 102.26     | 130.10     | 110.44     |
| Mean Night       | mg/dl        | 90.27      | 98.57      | 103.59     | 101.90     | 178.64     | 146.69     | 138.57     | 95.94      | 109.32     | 138.15     | 88.46      |
| Mean Day         | mg/dl        | 116.20     | 134.60     | 122.40     | 133.40     | 207.20     | 153.90     | 120.50     | 139.50     | 125.14     | 146.90     | 137.20     |
| SD 24            | mg/dl        | 18.30      | 39.46      | 17.61      | 26.56      | 36.95      | 43.88      | 30.02      | 42.75      | 27.28      | 25.04      | 29.59      |
| Before Breakfast | mg/dl        | 100.80     | 88.25      | 124.30     | 100.54     | 183.00     | 138.20     | 103.56     | 117.89     | 113.50     | 132.56     | 113.71     |
| Before Lunch     | mg/dl        | 83.20      | 103.33     | 104.80     | 109.33     | 164.00     | 132.44     | 90.90      | 94.42      | 118.28     | 124.30     | 109.93     |
| Before Dinner    | mg/dl        | 95.80      | 117.67     | 97.00      | 130.03     | 149.56     | 144.38     | 103.70     | 99.67      | 118.54     | 128.11     | 110.50     |
| After Breakfast  | mg/dl        | 113.79     | 135.32     | 125.19     | 127.57     | 202.67     | 208.95     | 156.76     | 149.90     | 137.90     | 149.90     | 132.50     |
| Afte Lunch       | mg/dl        | 118.34     | 174.39     | 116.38     | 115.09     | 209.34     | 143.76     | 118.32     | 174.00     | 135.81     | 152.11     | 182.91     |
| Afte Dinner      | mg/dl        | 113.20     | 127.81     | 129.93     | 141.43     | 214.48     | 216.25     | 134.05     | 133.81     | 128.61     | 164.00     | 143.74     |
| MAX. Breakfast   | mg/dl        | 141.75     | 165.00     | 149.00     | 166.75     | 240.33     | 222.67     | 200.33     | 221.33     | 198.00     | 175.00     | 158.00     |
| MAX. Lunch       | mg/dl        | 128.60     | 203.25     | 144.33     | 151.20     | 254.60     | 186.00     | 132.70     | 207.00     | 149.00     | 178.50     | 206.40     |
| MAX. Dinner      | mg/dl        | 123.00     | 163.33     | 153.75     | 186.20     | 250.33     | 254.00     | 157.30     | 153.67     | 167.25     | 185.00     | 156.00     |
| AUC180/iAUC      | %            | 0.00       | 3.46       | 0.00       | 2.09       | 53.23      | 29.76      | 4.12       | 15.95      | 5.56       | 7.59       | 9.77       |
| MGTT             | mg/dl h      | 36.38      | 52.46      | 50.88      | 60.29      | 52.96      | 103.96     | 77.96      | 54.67      | 51.17      | 49.00      | 42.67      |
| M-Value          | A.U          | 5.50       | 10.32      | 3.90       | 5.40       | 19.64      | 15.70      | 7.40       | 11.28      | 6.50       | 6.90       | 9.00       |
| %CV              | %            | 17.90      | 31.50      | 15.69      | 21.86      | 19.36      | 27.88      | 24.39      | 33.49      | 22.50      | 16.93      | 23.44      |
| BGRI             | A.U          | 1.44       | 3.65       | 0.78       | 1.73       | 10.51      | 5.20       | 2.11       | 3.38       | 1.54       | 3.26       | 2.04       |
| MODD             | mg/dl        | 18.10      | 29.88      | 19.42      | 23.89      | 48.85      | 36.98      | 25.66      | 27.10      | 22.03      | 22.44      | 22.06      |
| MAGE             | mg/dl        | 40.46      | 75.96      | 36.63      | 49.80      | 84.49      | 75.79      | 60.08      | 89.93      | 66.78      | 48.27      | 66.15      |
| COGNA6           | mg/dl        | 16.53      | 33.48      | 14.20      | 24.84      | 29.20      | 43.27      | 26.80      | 39.49      | 26.59      | 19.22      | 24.12      |
| COGNA4           | mg/dl        | 18.87      | 31.84      | 15.12      | 22.80      | 32.15      | 38.92      | 28.80      | 41.99      | 28.44      | 20.78      | 24.51      |
| COGNA2           | mg/dl        | 16.55      | 22.74      | 13.44      | 20.61      | 26.83      | 30.37      | 22.91      | 35.74      | 27.01      | 19.33      | 23.65      |
| INS              | μIU/ml       | 3.83       | 2.75       | 3.58       | 3.28       | 6.11       | 4.16       | 8.83       | 2.78       | 1.06       | 5.03       | 3.47       |
| Cortisol         | ng/ml        | 78.80      | 176.00     | 113.80     | 69.80      | 57.80      | 133.20     | 107.00     | 169.20     | 71.00      | 128.20     | 116.40     |
| FBG              | mg/dl        | 104.00     | 75.00      | 135.00     | 114.00     | 182.00     | 155.00     | 91.00      | 125.00     | 107.00     | 157.00     | 133.00     |
| HbA1c            | %            | 6.60       | 6.70       | 6.60       | 5.90       | 8.20       | 7.00       | 6.70       | 6.70       | 5.80       | 7.60       | 6.90       |
